# Supplementary material for: Probiotic Bifidobacterium longum supplied with methimazole improved the thyroid function of Graves’ disease patients through the gut-thyroid axis
Source: PubMed Central journal article supplement (PMC8423791; doi:10.1038/s42003-021-02587-z), 2021-09-07
Supplement: 42003_2021_2587_MOESM2_ESM.pdf [file 42003_2021_2587_MOESM2_ESM.pdf]

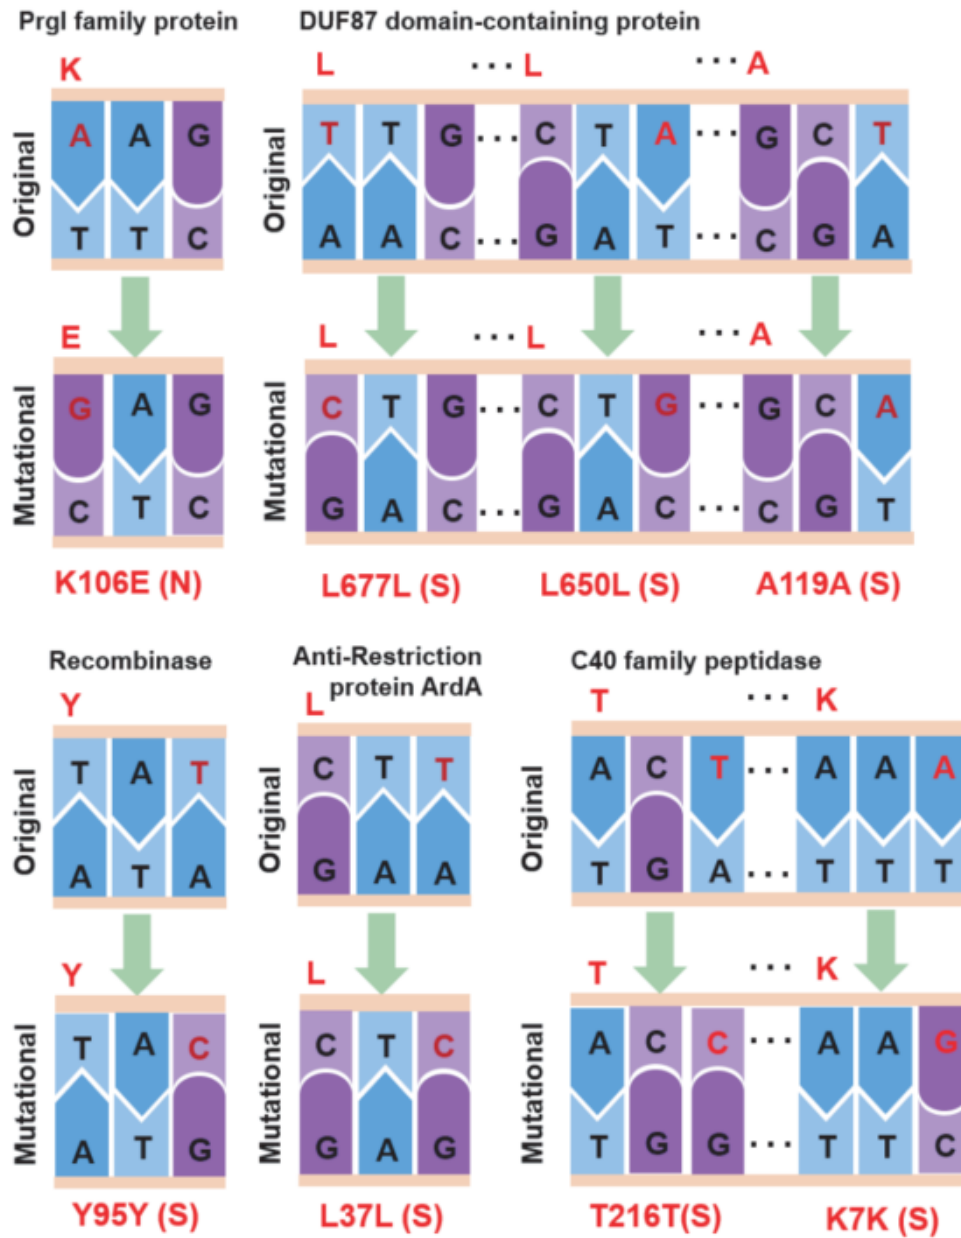

Figure S1. SNP annotated in *Roseburia hominis* genome
